# Supplementary material
Source: PubMed Central journal article supplement (PMC2630096)
Supplement: 0810310106_0810310106SI.pdf [file 0810310106_0810310106SI.pdf]

# Supporting Information

Lahmy *et al.* 10.1073/pnas.0810310106

## SI Materials and Methods

**Plant Materials.** *nrpe5a-1* (FLAG 607D12), *nrpe5b-1* (SALK\_134107) and *nrpe5c-1* (GABI454F05) homozygous plants were genotyped by PCR (1, 2, 3). The endogenous copy of the gene was detected using primers 149/152, 513/514 and 515/516 respectively. The T-DNA insertions were followed using primers Tag6/149, LBA1/513 and 8409/515.

**Semiquantitative and Real-Time PCR Amplifications.** Primers 786/787 for EF1-4 $\alpha$  were used as calibration control and primers 603/604, 149/152, 513/514 and 515/516 were used for *NRPB5a*, *NRPE5a*, *NRPE5b* and *NRPE5c* respectively. Primers LTR625-F and LTR625-R for *IG/LINE* and GAPA-F, GAPA-R for *GAPA* (At3g26650) a constitutively expressed gene as control, were reported in Huettel *et al.* (4). RT-PCR conditions were as follows: 94°C for 3 min, followed by 22 cycles of 94°C for 30 s, 55°C for 30 s, 72°C for 30 s, for GAPA or 28 for *IG/LINE*. Real-time PCR amplification was performed using the same

primers and LightCycler 480 SYBR Green I Master (ROCHE Diagnostics) to analyze expression of *IG/LINE*. Data were analyzed using Light cycler software (Roche). Relative transcript levels were calculated using  $\Delta$  CT method (5). GAPA was used as internal reference.

**Immunoprecipitation.** For PolIII immunoprecipitation, plant extracts were prepared as described in Li *et al.* (6). Dynabeads M-280 Sheep anti-Mouse IgG (Invitrogen) were used to bind the anti-NRPB1 8WG16 antibody (Abcam) using 3  $\mu$ l for 100  $\mu$ l of beads resuspended in PBS/BSA (5 mg/ml BSA in isotonic (PBS) pH 7.2–7.6 as recommended by the manufacturer) and rotated O/N at 4°C. After 3 washes in isotonic PBS, the coated Dynabeads were resuspended into the plant extracts and rotated for 2h. After 3 washes in IP buffer, the bound material was recovered by a direct addition of SDS/PAGE loading buffer. The same experiment was carried out without any antibody as a negative control.

1. Alonso JM, *et al.* (2003) Genome-wide insertional mutagenesis of *Arabidopsis thaliana*. *Science* 301:653–657.
2. Samson F, *et al.* (2002) FLAGdb/FST: a database of mapped flanking insertion sites (FSTs) of *Arabidopsis* T-DNA transformants. *Nucleic Acids Res* 30:94–97.
3. Rosso MG, *et al.* (2003) An *Arabidopsis thaliana* T-DNA mutagenized population (GABI-Kat) for flanking sequence tag-based reverse genetics. *Plant Mol Biol* 53:247–259.
4. Huettel B, *et al.* (2006) Endogenous targets of RNA-directed DNA methylation and PolIV in *Arabidopsis*. *EMBO J* 25:2828–2836.
5. Livak KJ, Schmittgen TD (2001) Analysis of relative gene expression data using real-time quantitative PCR and the 2(-Delta Delta C(T)) method. *Methods* 25:402–408.
6. Li CF, *et al.* (2006) An ARGONAUTE4-containing nuclear processing center colocalized with Cajal bodies in *Arabidopsis thaliana*. *Cell* 126:93–106.

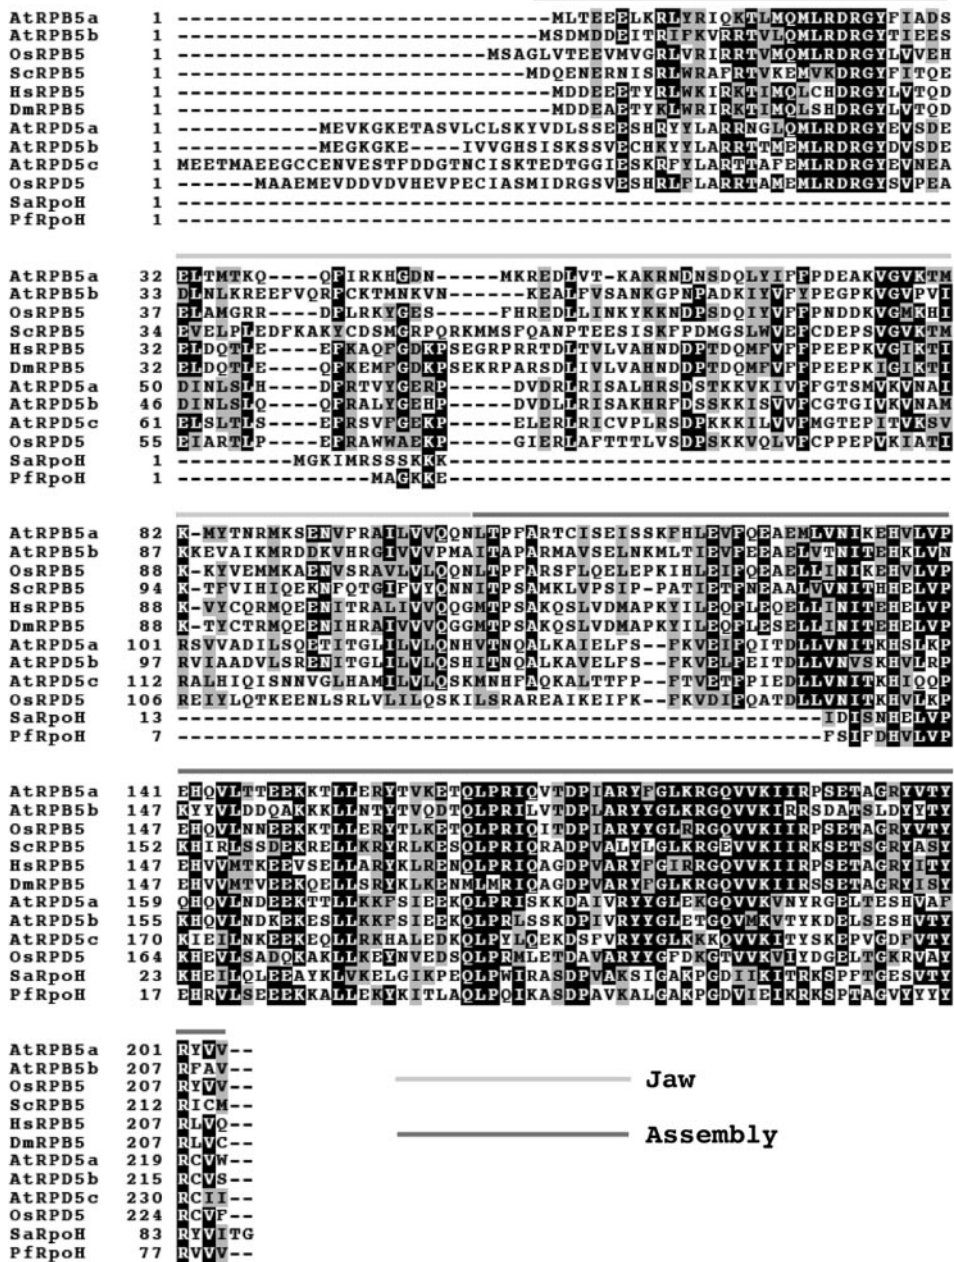

**Fig. 51.** Amino acid sequence alignments of *Arabidopsis thaliana* RPB5-type proteins with their counterparts in animal, fungi and archaeal RNA polymerases. Boundaries of both the eukaryote-specific N-terminal Jaw domain and the conserved C-terminal Assembly domain are indicated gray/dark lines. Abbreviations: Sc, *Saccharomyces cerevisiae*; At, *Arabidopsis thaliana*; Os, *Oryza sativa*; Hs, *Homo sapiens*; Dm, *Drosophila melanogaster*; Pf, *Pyrococcus furiosus*; Sa, *Sulfolobus acidocaldarius*

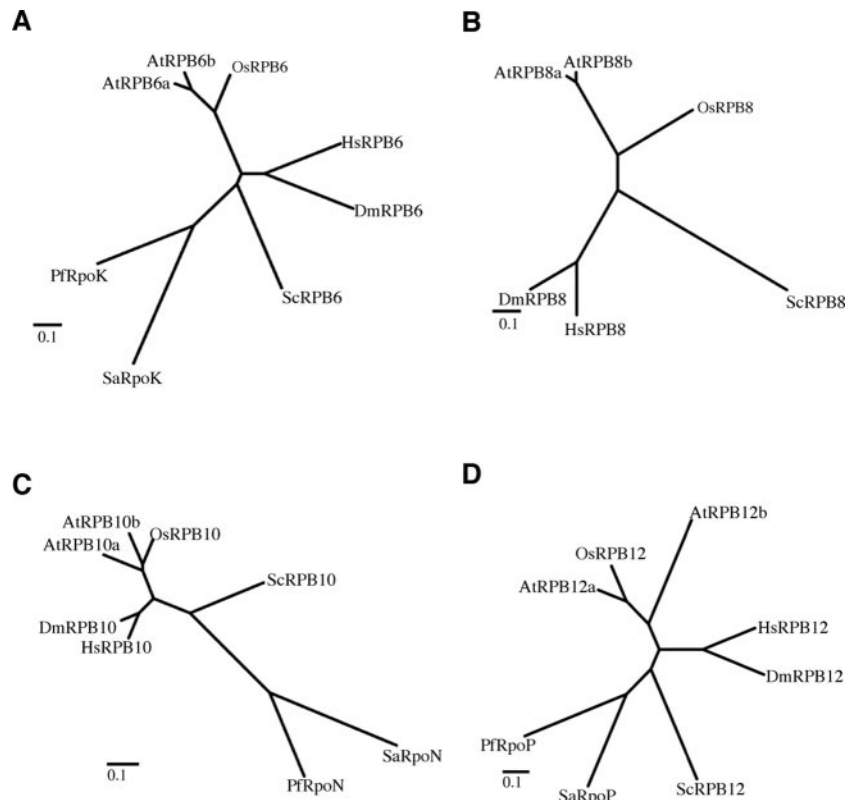

**Fig. S2.** Evolutionary relationships between RPB6-, 8-, 10- and 12-type proteins and related factors (A, B, C, and D respectively). The unrooted phylogenetic trees were inferred from the full-length protein alignment. Abbreviations: Sc, *Saccharomyces cerevisiae*; At, *Arabidopsis thaliana*; Os, *Oryza sativa*; Hs, *Homo sapiens*; Dm, *Drosophila melanogaster*; Pf, *Pyrococcus furiosus*; Sa, *Sulfolobus acidocaldarius*.

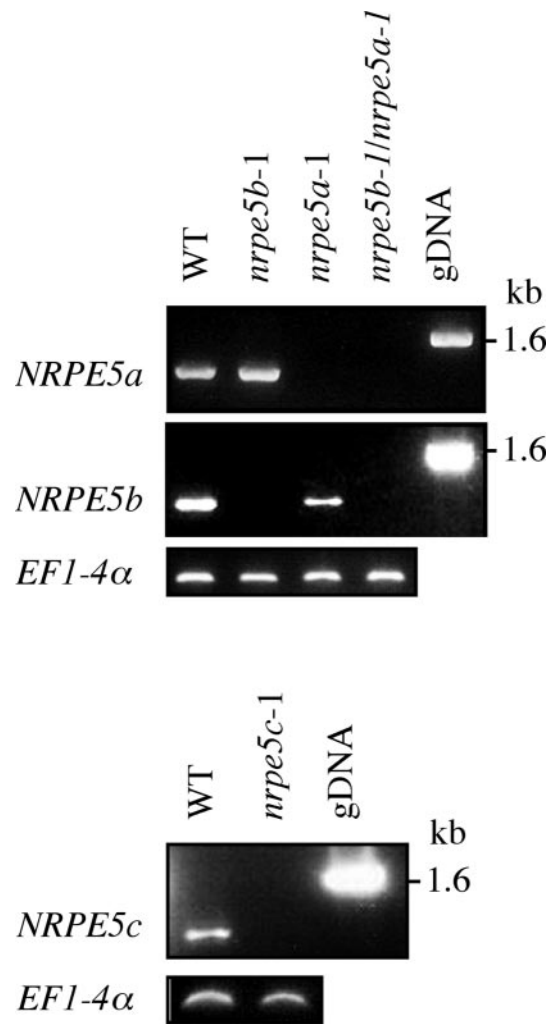

**Fig. S3.** *NRPE5* genes expression in wild-type plants and homozygous mutants shown by RT-PCR on flower total RNA. gDNA represents the genomic DNA control. *EF1-4 $\alpha$*  is used as a control to standardize the RT-PCR reactions.

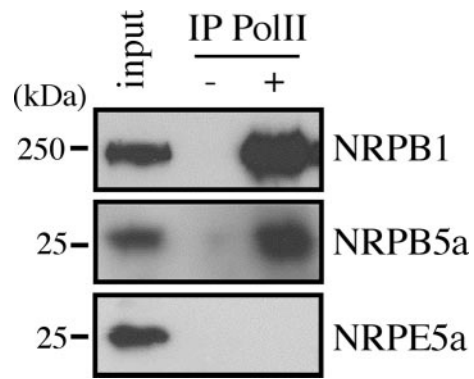

**Fig. S4.** Immunoprecipitation of PolII. PolII complex was immunoprecipitated from Columbia inflorescences using the anti-NRPB1 8WG16 antibody (+). As a control, the same experiment was performed without antibody (-). The "input" lane corresponds to the plant extracts prior immunoprecipitation. These samples were used run onto SDS/PAGE gels and subjected to Western blots using anti-NRPB1, anti-NRPB5a and anti-NRPE5a antibodies.

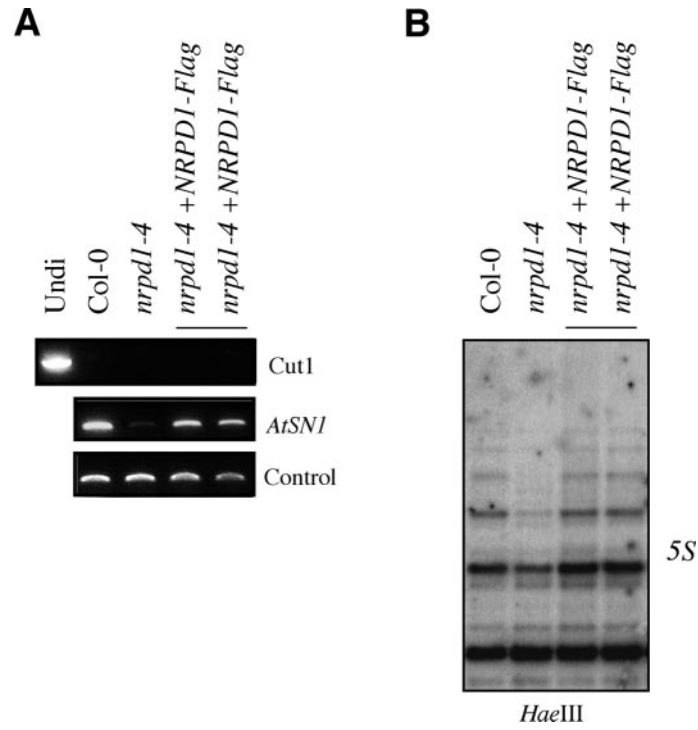

**Fig. S5.** Complementation of the *nrpd1a-4* mutant. (A) *AtSN1* DNA methylation in *nrpd1a-4* is rescued by transgenes expressing a Flag-tagged version of NRPD1a. Two independent T1 transgenic lines are shown. Undigested DNA represents the Col-O undigested DNA control. (B) 5S DNA methylation in *nrpd1a-4* is restored by a transgene expressing a Flag-tagged version of NRPD1 (NRPD1a). Genomic DNA from wild-type, *nrpd1-4* and two independent T1 transgenic lines were digested by *HaeIII* and subjected to Southern Blot analysis using 5S probe.

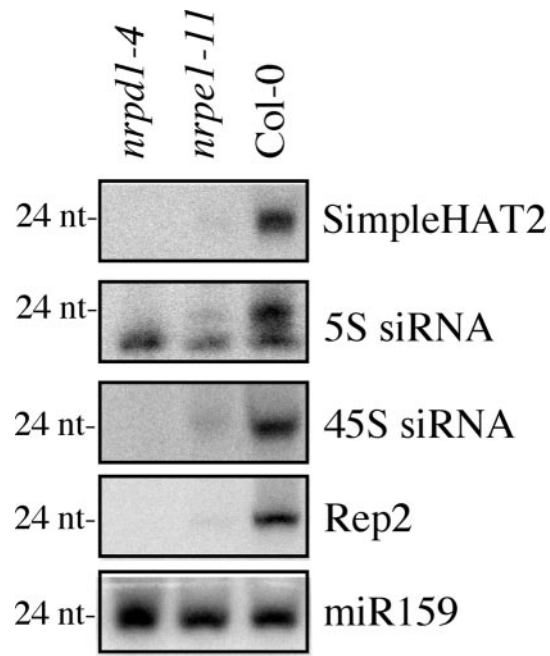

**Fig. S6.** sRNA accumulation in *nrpd1/nrpe1* mutants at PolIV(PollVa)/PolV(PollVb)-dependent loci. Analysis of sRNA accumulation by Northern blot done with 30  $\mu$ g of total RNA from inflorescences from wild-type (Col-0), *nrpd1-4* and *nrpe1-11*.

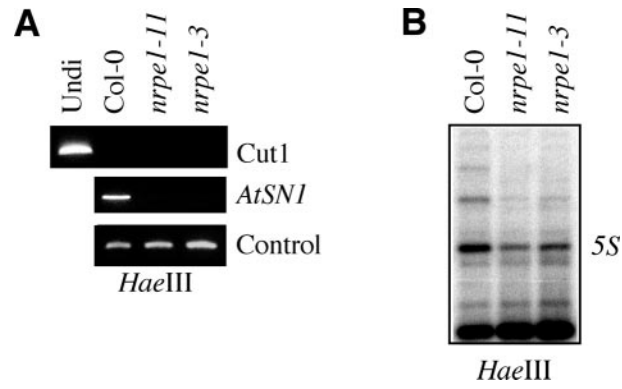

**Fig. 57.** Loss of CNN methylation at 5S and *AtSN1* loci in wild-type and *nrpe1* mutants. (A) *HaeIII* digested DNA were used as templates for *AtSN1* PCR reactions. Undi represents the Col-0 undigested genomic DNA. (B) Southern blot analysis of methylation at the 5S locus. Genomic DNA from wild-type, *nrpe1-11* and *nrpe1-3* mutants were digested by *HaeIII*.



**Table S1. Primers and peptides used in this study**

| Name                                   | Sequence                                      |
|----------------------------------------|-----------------------------------------------|
| Primers used for genotyping and RT-PCR |                                               |
| 149                                    | 5'-gtgaaagggaaagagacagct-3''                  |
| 152                                    | 5'-tcaccacacacatcggaaggc-3''                  |
| 352                                    | 5''-aagcttcttctgttagagatcatcttaaggcgcg-3''    |
| 462                                    | 5''-gtcgacatggaagacgattgtgaggagcttcag-3''     |
| 463                                    | 5''-ccatggcggggtttcggagaaccaccgga-3''         |
| 465                                    | 5''-ggatccgtcgaccatcagtaaggaaaatttagatacg-3'' |
| 513                                    | 5''-gggaaagagatagtgttg-3''                    |
| 514                                    | 5''-agaaacgcatcggtagtaac-3''                  |
| 515                                    | 5''-acaatggccgaagaagggtgc-3''                 |
| 516                                    | 5''-acaattgaagcacaccaaggacac-3''              |
| 603                                    | 5''-gatgttgacggaagaggaggtc-3''                |
| 604                                    | 5''-cgataggtaacataacgaccagccg-3''             |
| 786                                    | 5''-ctaaggatggtcagaccg-3''                    |
| 787                                    | 5''-cttcaggtatgaagacacc-3''                   |
| Primers used for sRNA probes           |                                               |
| 5S                                     | 5''-atgccaagttggcctcacggtct-3''               |
| 45S                                    | 5''-gtctgttggtccaagagggaaaagggcta-3''         |
| si02                                   | 5''-gttgaccagtcgccagccgat-3''                 |
| Rep2                                   | 5''-gcgggacgggtttggcaggagcgttactta-3''        |
| SimpleHat                              | 5''-tgggttaccatttgacacccta-3''                |
| TR2558                                 | 5''-ttcatcagcatgaccgatagctta-3''              |
| TR2558                                 | 5''-ttgttcaatcattcattggccat-3''               |
| miR159                                 | 5''-tagagctcccttcaatccaaa-3''                 |
| U6                                     | 5-aggggccatgctaacttctc-3                      |
| Peptide used for antibody production   |                                               |
| NRPE5a_ pep: TKHSLKPQHQLNDE            |                                               |
| NRPE5c_ pep: KEPVGDFVYRCII             |                                               |
